# Supplementary material for: Astragalus Polysaccharide Extends Lifespan via Mitigating Endoplasmic Reticulum Stress in the Silkworm, Bombyx mori
Source: PubMed Central journal article supplement (PMC6844597; doi:10.14336/ad.2019.0515), 2019-12-01
Supplement: AD-10-6-1187-s.pdf [file AD-10-6-1187-s.pdf]

## SUPPLEMENTARY DATA

# ***Astragalus* Polysaccharide Extends Lifespan via Mitigating Endoplasmic Reticulum Stress in the Silkworm, *Bombyx mori***

**Jiangbo Song<sup>#</sup>, Min Chen<sup>#</sup>, Zhiquan Li, Jianfei Zhang, Hai Hu, Xiaoling Tong<sup>\*</sup>, Fangyin Dai<sup>1,\*</sup>**

State Key Laboratory of Silkworm Genome Biology, Key Laboratory for Sericulture Biology and Genetic Breeding, Ministry of Agriculture and Rural Affairs, College of Biotechnology, Southwest University, Chongqing 400716, China

# SUPPLEMENTARY DATA

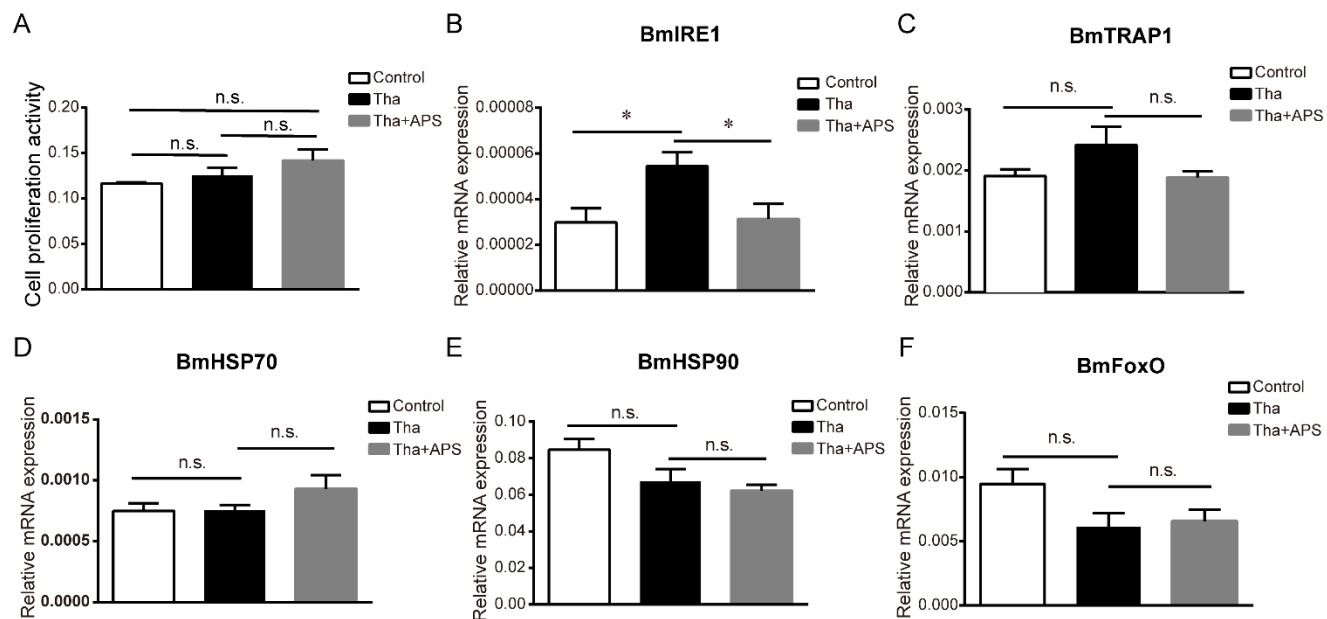

Supplementary Figure 1. Detection of cell proliferation and the response of relative genes after thapsigargin and APS co-treatment.
